# Supplementary material for: Summertime surface PM 1 aerosol composition and size by source region at the Lampedusa island in the central Mediterranean Sea
Source: Copernicus journal article supplement (doi:10.5194/acp-2019-192), 2019-03-12
Supplement: Supplementary file 1 [file acp-2019-192-supplement.pdf]

Supplementary Material for:

## Summertime surface PM<sub>1</sub> aerosol composition and size by source region at the Lampedusa island in the central Mediterranean Sea

Marc D. Mallet<sup>1,2,3</sup>, Barbara D'Anna<sup>2,4</sup>, Aurélie Mème<sup>2,\*</sup>, Maria Chiara Bove<sup>5,6</sup>,  
Federico Cassola<sup>5,7</sup>, Giandomenico Pace<sup>8</sup>, Karine Desboeufs<sup>1</sup>, Claudia Di Biagio<sup>1</sup>, Jean-  
Francois Doussin<sup>1</sup>, Michel Maille<sup>1</sup>, Dario Massabò<sup>5</sup>, Jean Sciare<sup>9</sup>, Pascal Zapf<sup>1</sup>, Alcide  
Giorgio di Sarra<sup>8</sup> and Paola Formenti<sup>1</sup>

1. LISA, CNRS UMR7583, Université Paris Est Créteil (UPEC), Université Paris Diderot (UPD), Institut Pierre Simon Laplace (IPSL), Créteil, France
2. IRCELYON, CNRS UMR 5652, Univ. Lyon1, Lyon, France
3. Centre National d'Etudes Spatiales (CNES), Toulouse, France
4. LCE, CNRS UMR 7376, Aix-Marseille Université, Marseille, France
5. Department of Physics & INFN, University of Genoa, Genoa, Italy
6. ARPAL Physical Agents and Air Pollution Sector, La Spezia, Italy
7. ARPAL CFMI-PC, Genoa, Italy (current affiliation)
8. Laboratory for Observations and Analyses of Earth and Climate, ENEA, Rome, Italy
9. The Cyprus Institute, Energy, Environment and Water Research Center, Nicosia, Cyprus

\* now at Bruker

## Synoptic scale meteorology

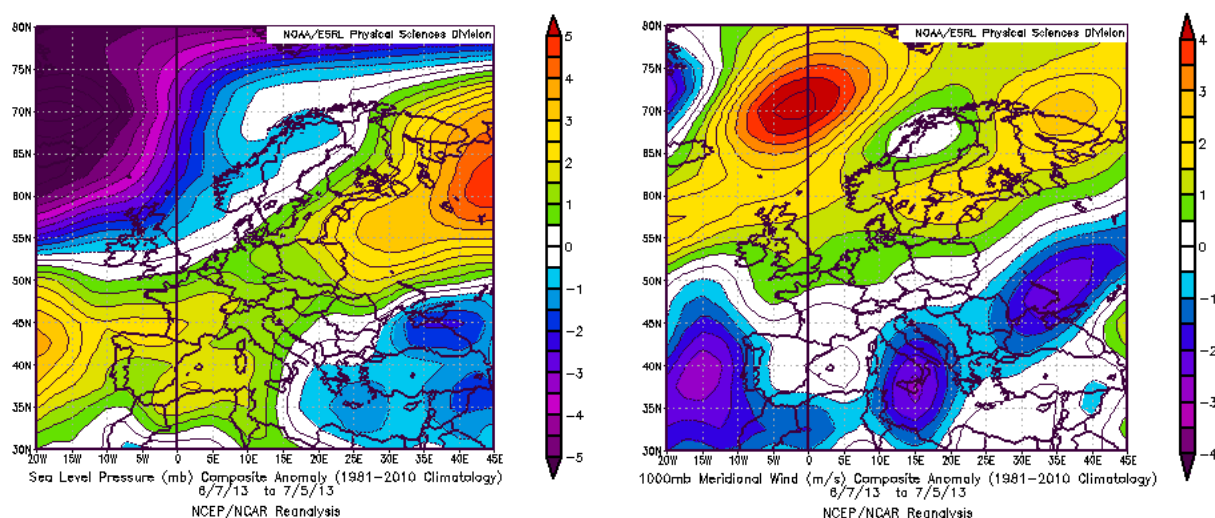

Supplementary Figure S1 Sea level pressure (left) and 1000 mb meridional wind component (right) composite anomalies of the ADRIMED campaign period with respect to the 1981-2010 climatology obtained from the NCEP/NCAR Reanalysis. Images were provided by the NOAA/ESRL Physical Sciences Division, Boulder Colorado (<http://www.esrl.noaa.gov/psd/>).

## Origin of Sulphates

The total averaged aerosol mass concentration ( $PM_{total}$ ) measured by the FDMS-TEOM during the campaign was  $37 \mu g m^{-3}$  (maximum value up to  $126 \mu g m^{-3}$ ). The  $PM_{total}$  was relatively well correlated with TSP concentrations of ions associated with sea salt ( $Na^+$ ,  $Mg^+$ ,  $Cl^-$ ) measured by the PILS ( $R^2 \sim 0.5$ , not shown). The total TSP sea salt concentration, was less than half of the  $PM_{total}$ , suggesting that a significant fraction of coarse particles was not sea salt or soluble species. There was a positive correlation ( $R^2=0.80$ ) throughout the measurement period between the  $Na^+$  and  $Cl^-$  mass concentrations and wind speed (measured at the Lampedusa site) which is indicative of sea spray aerosol. Other trace elements associated with dust were low in concentration over the entire measurement period. As shown in Section 3.2, the highest observed sea salt concentrations throughout the campaign were observed during the "Mistral" air mass origin periods. These periods were accompanied by the highest wind speeds, likely a result of the rapid descent of the air masses after passing over southern France. Despite a relatively small accumulation mode, these Mistral air masses had the highest number of coarse mode particles which is consistent with the high sea salt concentrations.

For most of the campaign, there was good correlation between the  $PM_1$  and TSP  $SO_4^{2-}$  concentrations, with the exception of periods of high sea salt concentrations. The 3-day

samples obtained by the multistage cascade impactor show that majority of the elemental sulphur mass was within the  $PM_{10}$  size range.

However, during periods of high concentrations of sea salt, up to 48% of the elemental sulphur mass was associated with particles larger than  $1 \mu m$ . Some of this can be explained by the presence of seasalt-S, although up to 40% of the total nss-S was still associated with coarse mode particles. The two samples in the period 14-17 June and from the 17-20 June, characterized mostly by central European and eastern Mediterranean air masses, show relatively low sea salt ion concentrations. For those, the non-sea-salt fraction of elemental sulphur (nss-S) was nearly all under  $1 \mu m$ . During the periods of higher sea salt concentrations, there was a more pronounced partitioning of the nss-S between sub- and super-micron particles.

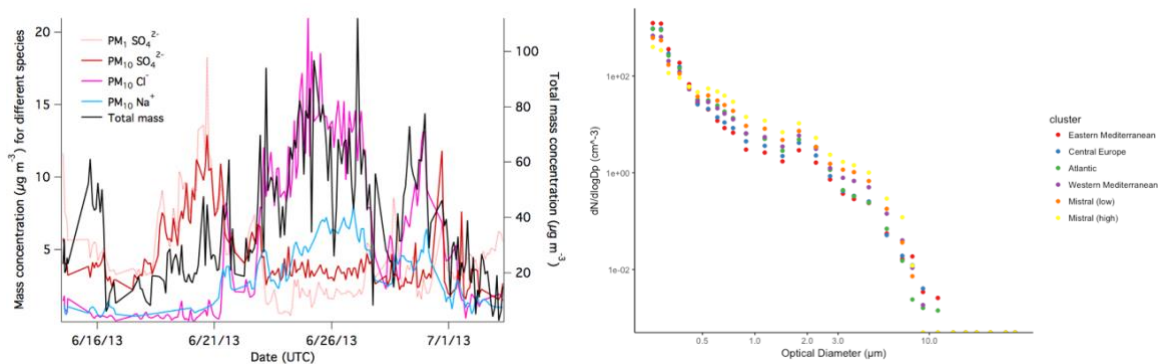

Supplementary Figure S2 (left) the time series of  $TPS Cl^-$  and  $Na^+$ ,  $PM_{10}$  and  $PM_1 SO_4^{2-}$  and the total particle mass from the TEOM and (right) the size distribution above  $0.26 \mu m$ , measured by the GRIMM OPC, with colours representing averages for different air mass origins.

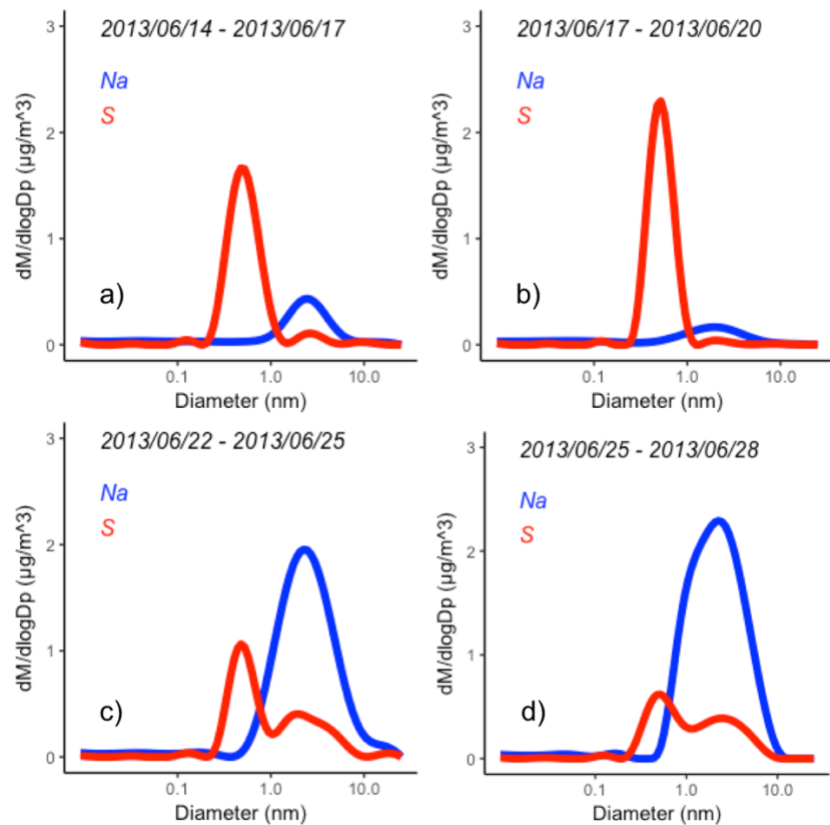

Supplementary Figure S3 Interpolated mass size distribution of  $\text{Na}^+$ ,  $\text{Cl}^-$  and  $\text{nss-S}$  for four different 3-day sampling periods, collected on a 13-stage cascade impactor. Note that the vertical scales are different in each graph.

### PMF mass reconstruction and residuals

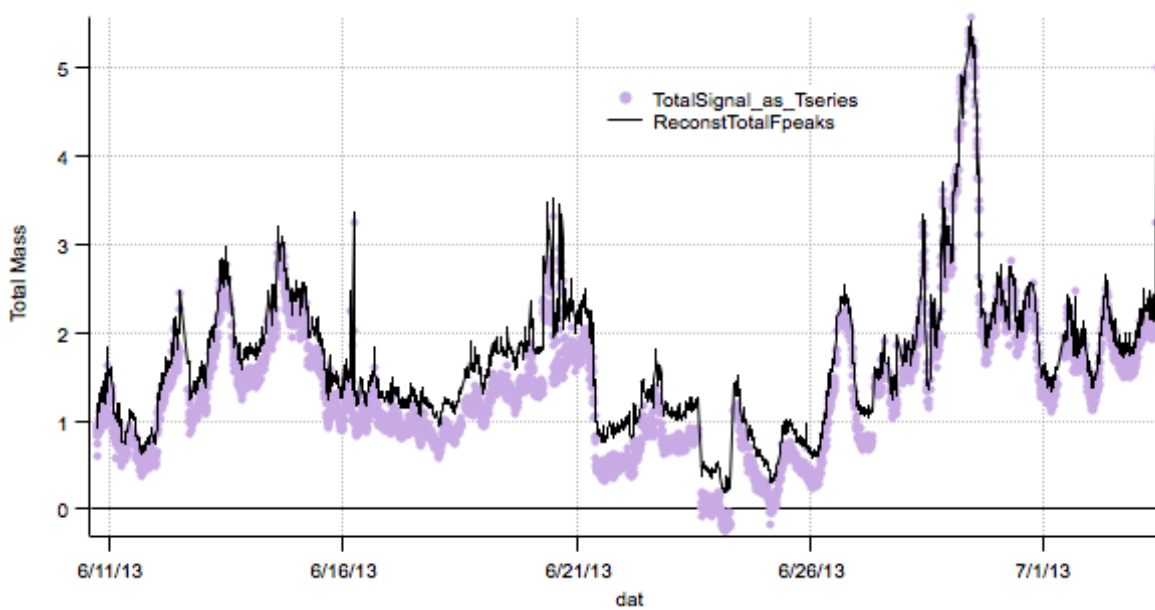

Supplementary Figure S4 Total organic signal and reconstructed from 4-factor PMF solution

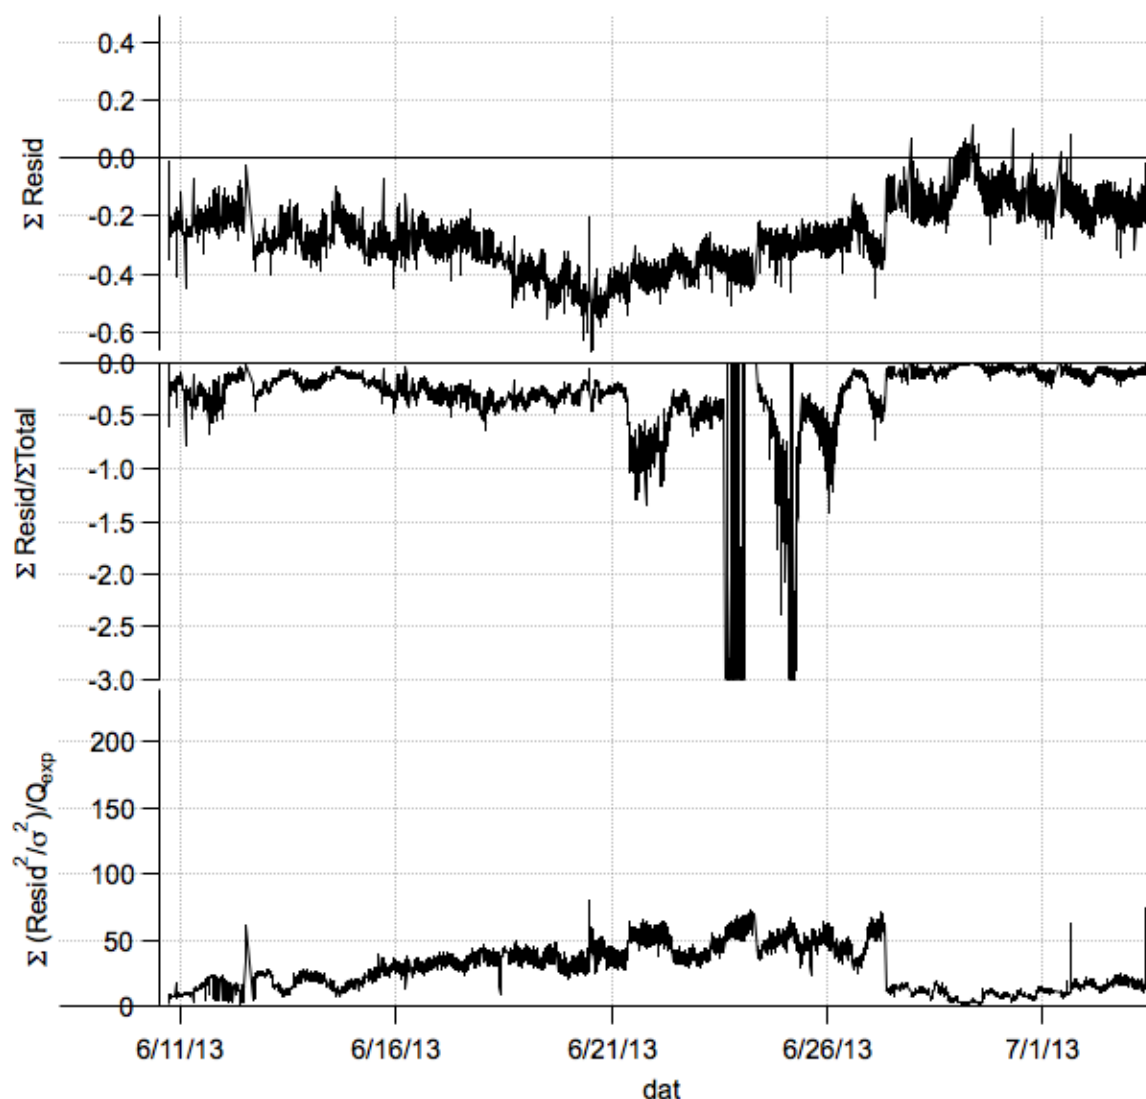

Supplementary Figure S5 Time series of residuals from 4-factor PMF solution

## Supplementary compositional material

Supplementary Table S1 A summary of studies that have investigated NR-PM<sub>1</sub> composition (including PMF of OA) at coastal sites surrounding the Mediterranean basin. Only studies that have investigated PMF-based OA source apportionment are reported. MO-OOA: More oxidised oxygenated organic aerosol, LO-OOA: less oxidised oxygenated organic aerosol, HOA: Hydrocarbon-like Organic Aerosol, SV-OOA: Semi-volatile oxygenated Organic Aerosol, LV-OOA: Low-volatility oxygenated Organic Aerosol, BBOA: Biomass burning Organic Aerosol, COA: Cooking Organic Aerosol, OOA: Oxygenated Organic Aerosol, F4: "Factor -4" (unidentified PMF factor), IndOA: Industry-related Organic Aerosol, OB-OA: "Olive-branch Organic Aerosol. PMF factors in bold indicate secondary organic aerosol. After the results of this study, observations are ordered according to longitude (west to east).

| AUTHORS (YEAR) | LOCATION | PERIOD | INSTRUMENT | PM <sub>1</sub> | MASS | AND | PMF FACTORS |
|----------------|----------|--------|------------|-----------------|------|-----|-------------|
|                |          |        |            | COMPOSITION     |      |     |             |

|                                  |                                                           |                                    |                                                        |                                                                                                                                         |                                                                                                                                                          |
|----------------------------------|-----------------------------------------------------------|------------------------------------|--------------------------------------------------------|-----------------------------------------------------------------------------------------------------------------------------------------|----------------------------------------------------------------------------------------------------------------------------------------------------------|
| <b>THIS STUDY</b>                | Lampedusa<br>(35°31'5"N,<br>12°37'51"E, 45 m<br>a.s.l.)   | 10 June - 5 July<br>2013 (summer)  | cToF-AMS                                               | 10.1 $\mu\text{g m}^{-3}$ (OA: 30%, $\text{SO}_4^{2-}$ : 44%, $\text{NH}_4^+$ : 18%, $\text{NO}_3^-$ : 1%, seasalt: 1%, eBC: 5%)        | HOA (8%)<br><b>MSA-OOA (12%)</b><br><b>OOA-2 (28%)</b><br><b>LV-OOA (53%)</b>                                                                            |
| <b>(MOHR ET AL., 2012)</b>       | Barcelona<br>(41°23'24"N,<br>02°6'58.1"E, 80<br>m a.s.l.) | March<br>(Spring)                  | 2009<br>HR-ToF-AMS                                     | 18.5 $\mu\text{g m}^{-3}$ (OA: 43%, $\text{SO}_4^{2-}$ : 16%, $\text{NH}_4^+$ : 9%, $\text{NO}_3^-$ : 18%, BC: 12%, Chl: 1%)            | HOA (16%)<br>BBOA (11%)<br>COA (17%)<br><b>SV-OOA (27%)</b><br><b>LV-OOA (28%)</b>                                                                       |
| <b>(MINGUILLÓN ET AL., 2016)</b> | Barcelona<br>(41°23'14"N,<br>02°06'56"E, 78 m<br>a.s.l.)  | 16 August - 6<br>September 2013    | ACSM                                                   | 10 - 14 $\mu\text{g m}^{-3}$ (OA: 59 - 57%, $\text{SO}_4^{2-}$ : 20%, $\text{NH}_4^+$ : 9 - 10%, $\text{NO}_3^-$ : 4 - 5%, EC: 8%)      | COA (17%)<br>HOA (8 - 10%)<br><b>SV-OOA (38 - 40%)</b><br><b>LV-OOA (36%)</b>                                                                            |
| <b>EL HADDAD ET AL., 2013</b>    | Marseille<br>(43°18'20"N,<br>5°23'40"E, 64 m<br>a.s.l.)   | 30 June - 14 July<br>2008 (Summer) | cToF-AMS                                               | $\text{PM}_{10}$ concentrations not explicitly stated. $\text{SO}_4^{2-}$ concentrations where generally similar or higher than OA.     | HOA (19%)<br>F4 (6%)<br><b>SV-OOA (34%)</b><br><b>LV-OOA (41%)</b>                                                                                       |
| <b>(BOZZETTI ET AL., 2017)</b>   | Marseille<br>(43°18'20"N,<br>5°23'40"E, 64 m<br>a.s.l.)   | August 2011 - July<br>2012         | HR-ToF-AMS<br>(nebulized<br>$\text{PM}_{2.5}$ filters) | 10 - > 50 $\mu\text{g m}^{-3}$ (OA: 37% - 51%, $\text{SO}_4^{2-}$ : 12%, $\text{NH}_4^+$ : 8%, $\text{NO}_3^-$ : 9%, EC: 9%, Other: 9%) | Summer:<br>HOA (17%)<br>BBOA (5%)<br>COA (4%)<br><b>OOA (55%)</b><br>IndOA (11%)<br>Winter:<br>BBOA (48%)<br>COA (4%)<br><b>OOA (27%)</b><br>IndOA (17%) |

Supplementary Table S2 The average speciated  $\text{PM}_{10}$  concentrations during periods of different air mass origin. Units are  $\mu\text{g m}^{-3}$ .

| Sector         | Organics | $\text{SO}_4^{2-}$ | $\text{NH}_4^+$ | $\text{NO}_3^-$ | Seasalt   | eBC       |
|----------------|----------|--------------------|-----------------|-----------------|-----------|-----------|
| Atlantic ocean | 2.8±0.9  | 4.0±1.5            | 1.7±0.6         | 0.91±0.03       | 0.25±0.09 | 0.46±0.08 |

|                     |                                                                  |         |         |           |           |           |
|---------------------|------------------------------------------------------------------|---------|---------|-----------|-----------|-----------|
|                     | (MO-OOA: 55%, LO-OOA: 24%,<br>MSA-OOA: 11%, HOA: 9% )            |         |         |           |           |           |
| Western<br>Europe   | 3.0±1.3<br>(MO-OOA: 44%, LO-OOA: 38%,<br>MSA-OOA: 10%, HOA: 8% ) | 3.5±1.6 | 1.4±0.6 | 0.10±0.05 | 0.35±0.18 | 0.51±0.09 |
| Mistral<br>(high)   | 1.7±0.4<br>(MO-OOA: 37%, LO-OOA: 36%,<br>MSA-OOA: 23%, HOA: 4% ) | 2.0±0.5 | 0.9±0.2 | 0.06±0.02 | 0.29±0.04 | 0.36±0.14 |
| Mistral<br>(Low)    | 3.2±1.1<br>(MO-OOA: 41%, LO-OOA: 40%,<br>MSA-OOA: 12%, HOA: 7% ) | 2.9±1.4 | 1.3±0.5 | 0.11±0.06 | 0.41±0.17 | 0.50±0.10 |
| Central<br>Europe   | 3.8±0.8<br>(MO-OOA: 58%, LO-OOA: 23%,<br>MSA-OOA: 11%, HOA: 8% ) | 6.4±1.8 | 2.4±0.5 | 0.13±0.05 | 0.26±0.07 | 0.53±0.17 |
| Eastern<br>Med.     | 3.1±0.6<br>(MO-OOA: 71%, LO-OOA: 14%,<br>MSA-OOA: 6%, HOA: 8%)   | 6.7±3.1 | 2.8±1.3 | 0.09±0.03 | 0.19±0.06 | 0.55±0.12 |
| Campaign<br>average | 3.0±1.1<br>(MO-OOA: 53%, LO-OOA: 28%,<br>MSA-OOA: 12%, HOA: 8%)  | 4.5±2.7 | 1.9±1.0 | 0.10±0.05 | 0.30±0.15 | 0.50±0.21 |

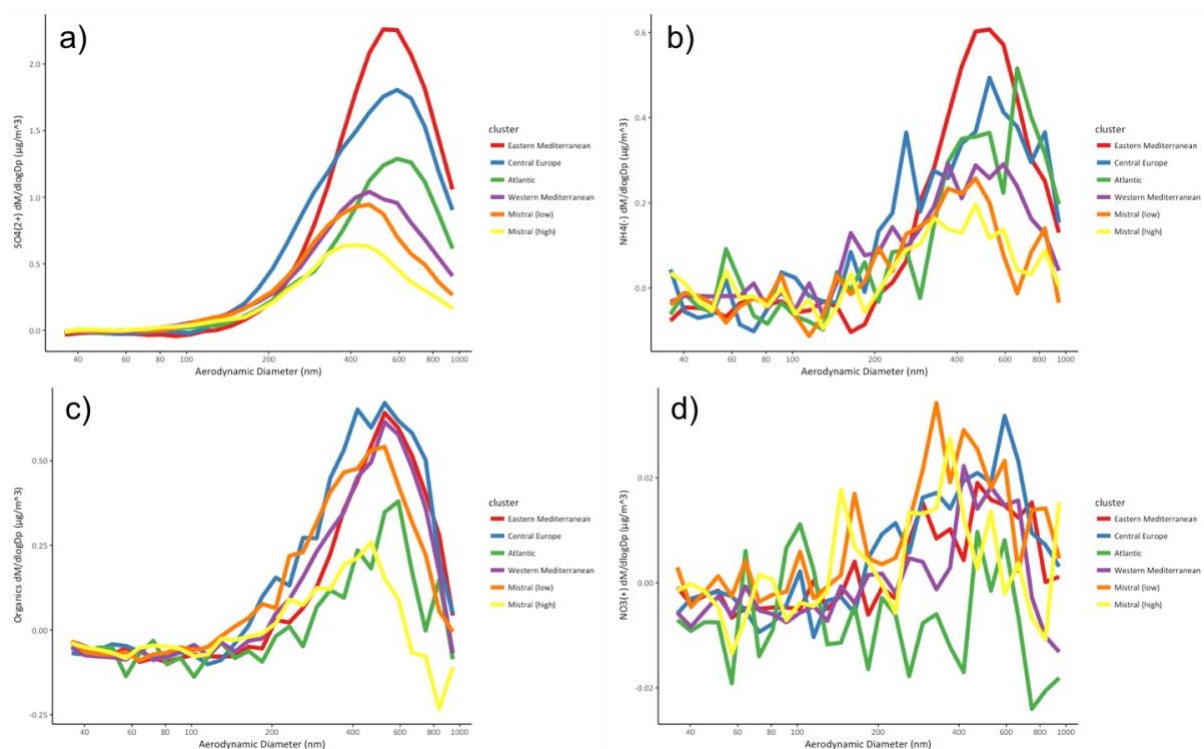

Supplementary Figure S6 The average size distribution of sulphates, ammonium, organics and nitrates, measured by the cToF-AMS with colours representing the different air mass origins.

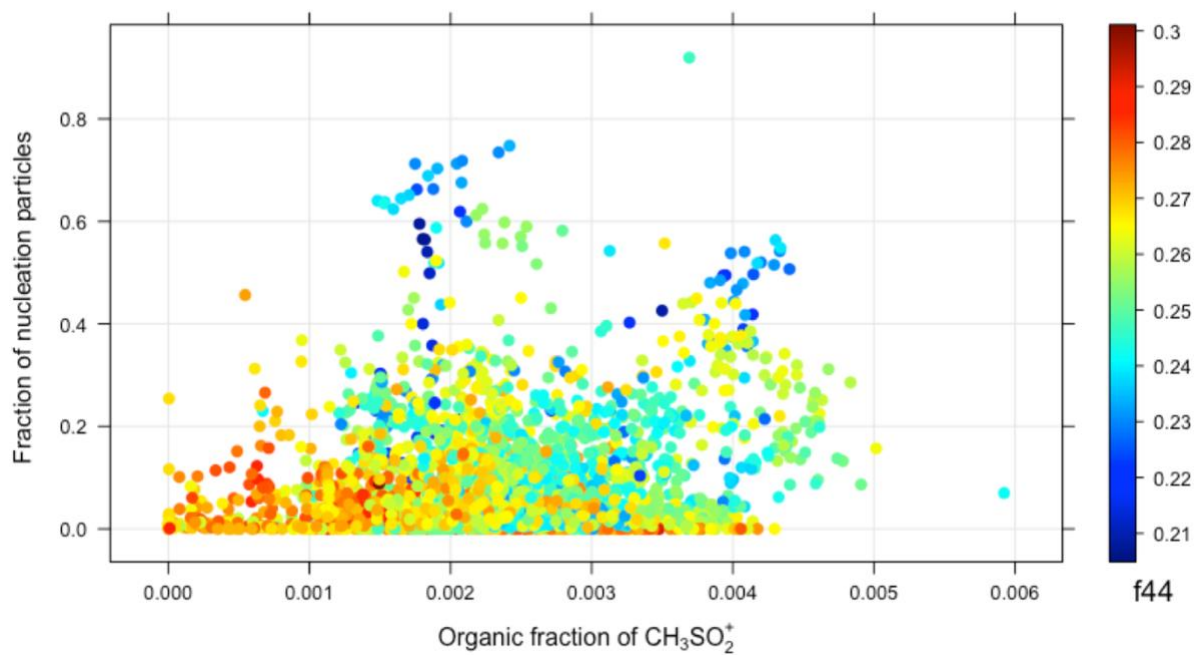

Supplementary Figure S7 The fraction of nucleation particles (particle number concentration between 14 and 25 nm divided by the particle number concentration between 14 and 600 nm), as a function of the organic fraction of  $PM_1 CH_3SO_2^+$
